# Supplementary material for: Spatial and Single-Cell Transcriptomics Reveal a Cancer-Associated Fibroblast Subset in HNSCC That Restricts Infiltration and Antitumor Activity of CD8+ T Cells
Source: PubMed Central journal article supplement — Cancer Res. 2023 Nov 6;84(2):258–75. doi: 10.1158/0008-5472.CAN-23-1448 (PMC10790129; doi:10.1158/0008-5472.can-23-1448), 2023-11-06
Supplement: can-23-1448_figure_s1-s8_supp8.pdf [file can-23-1448_figure_s1-s8_supp8.pdf]

**Supplemental Figures and Figure legends for:**

**An MHC-I- and galectin-9-dependent trap formed by cancer-associated fibroblasts restricts the anti-tumor function of CD8<sup>+</sup> T cells**

# Supplementary Figure S1

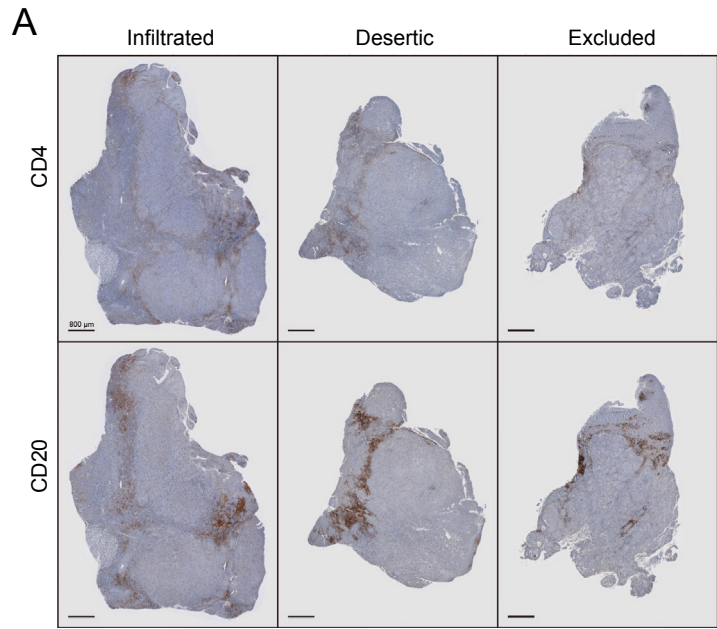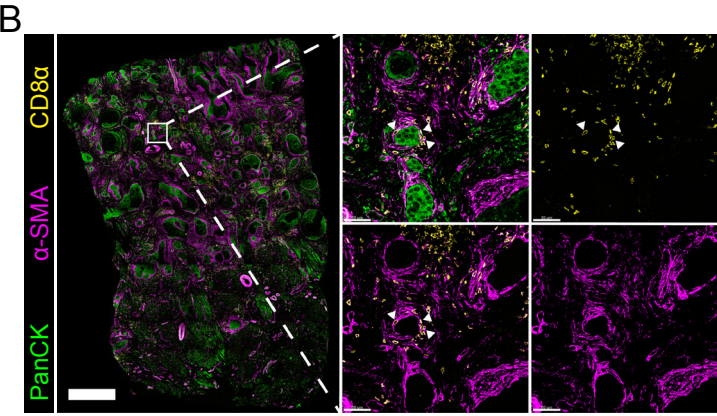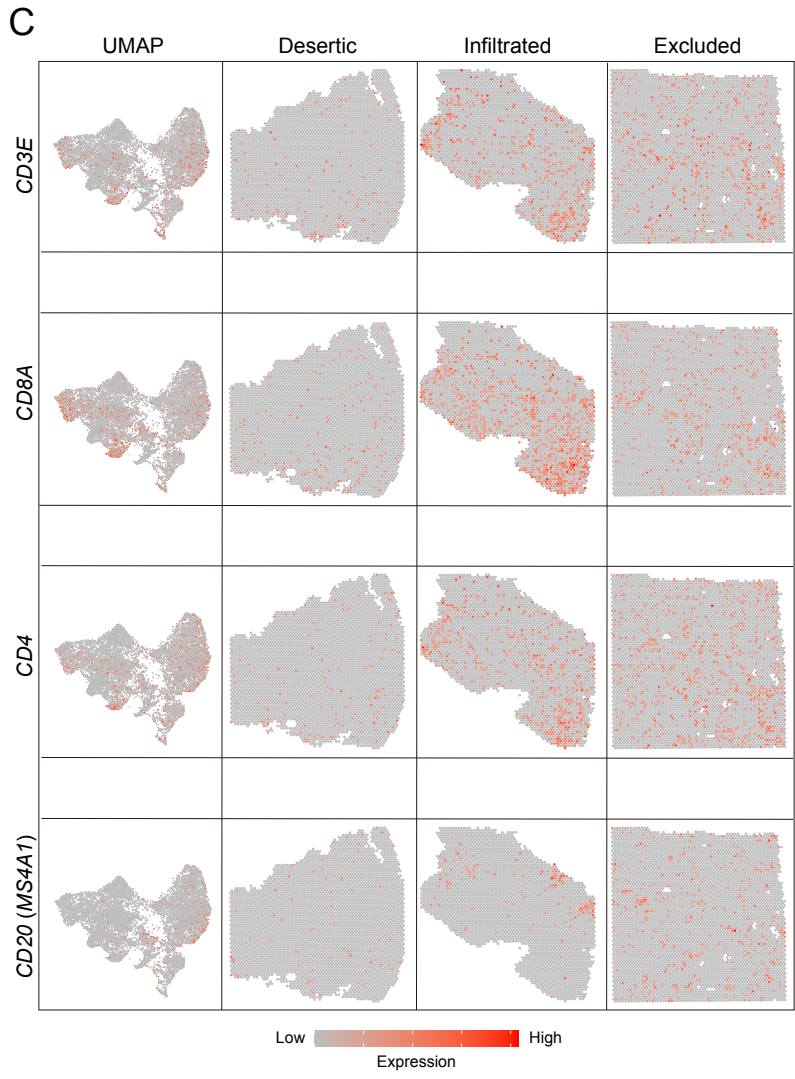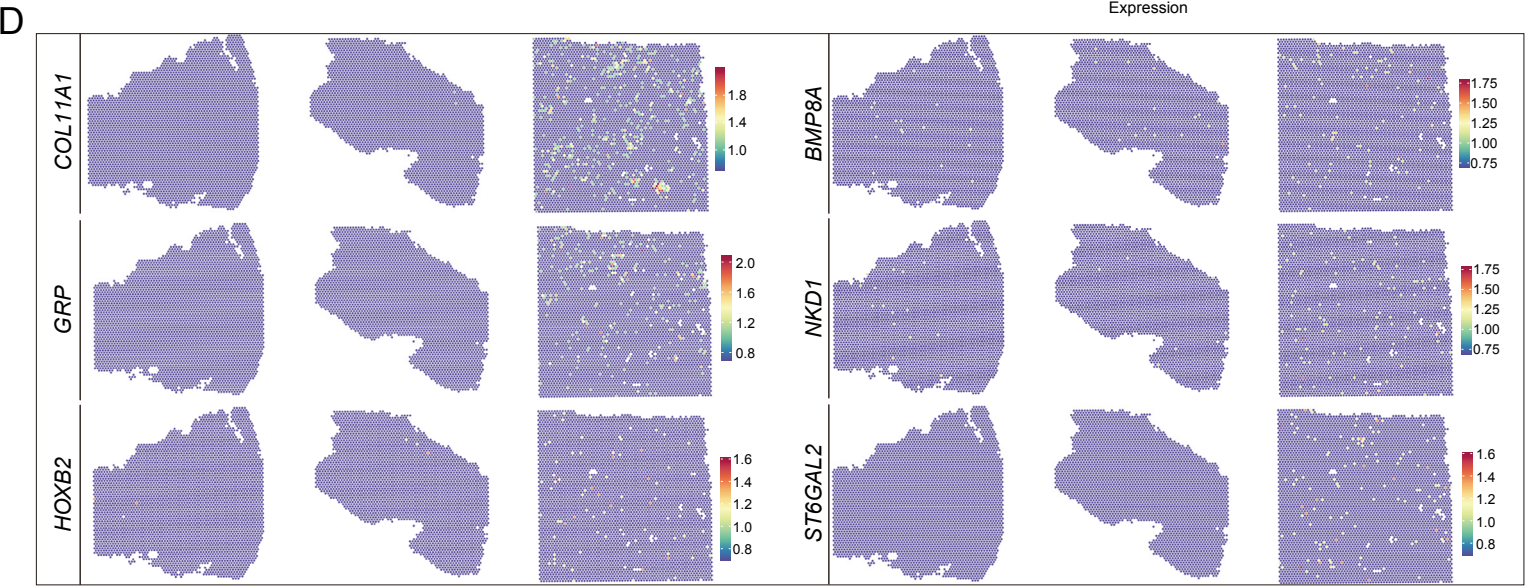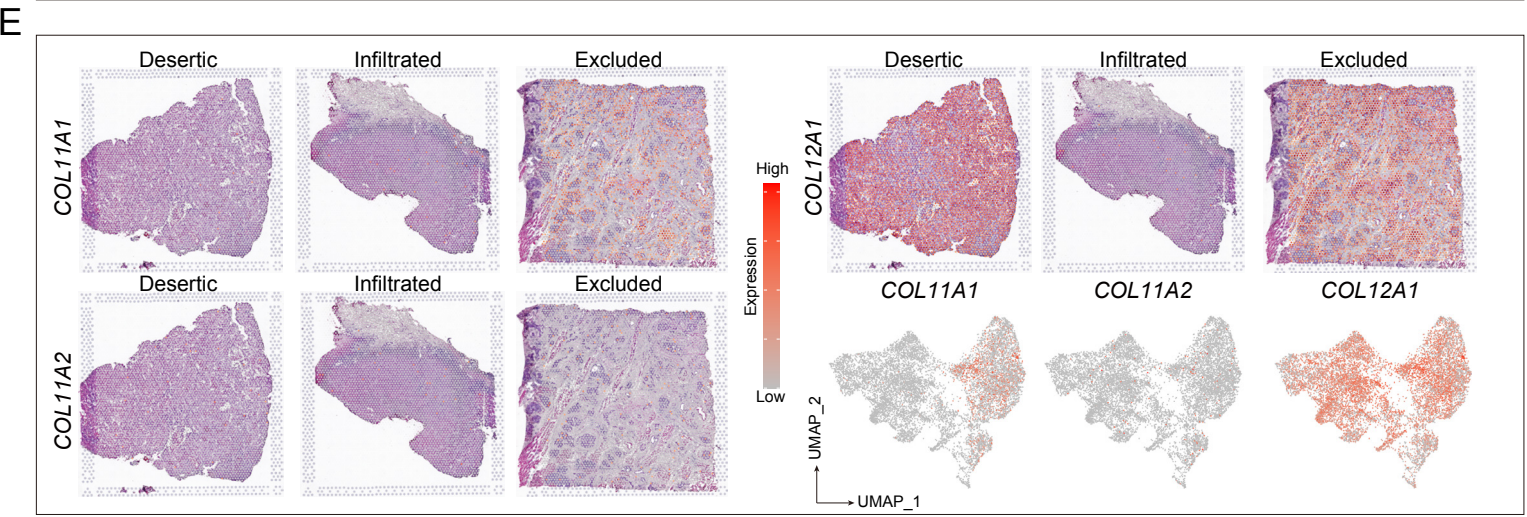

### **Supplementary Figure S1.**

Heterogeneity of spatial cell distribution and gene expression patterns among three immune types of HNSCC. **A**, IHC staining of CD4 and CD20 of the infiltrated, deserty and excluded immune type of HNSCC. **B**, Large scale of multiplex immunofluorescence of PanCK (green), CD8 $\alpha$  (yellow),  $\alpha$ -SMA (wine) of the excluded immune type of HNSCC. The representative region was labelled with white rectangle and magified. **C**, Expression distribution of lymphocyte-associated genes (*CD3E*, *CD8A*, *CD4* and *MS4A1*) in the specimens of spatial transcriptome analysis. **D**, The expression and distribution of top 5 markers of cluster 9, including *COL11A1*, *GRP*, *HOXB2*, *BMP8A*, *NKD1* and *ST6GAL2*. **E**, The expression and distribution of *COL11A1*, *COL11A2* and *COL12A1* in the three specimens.



# Supplementary Figure S2

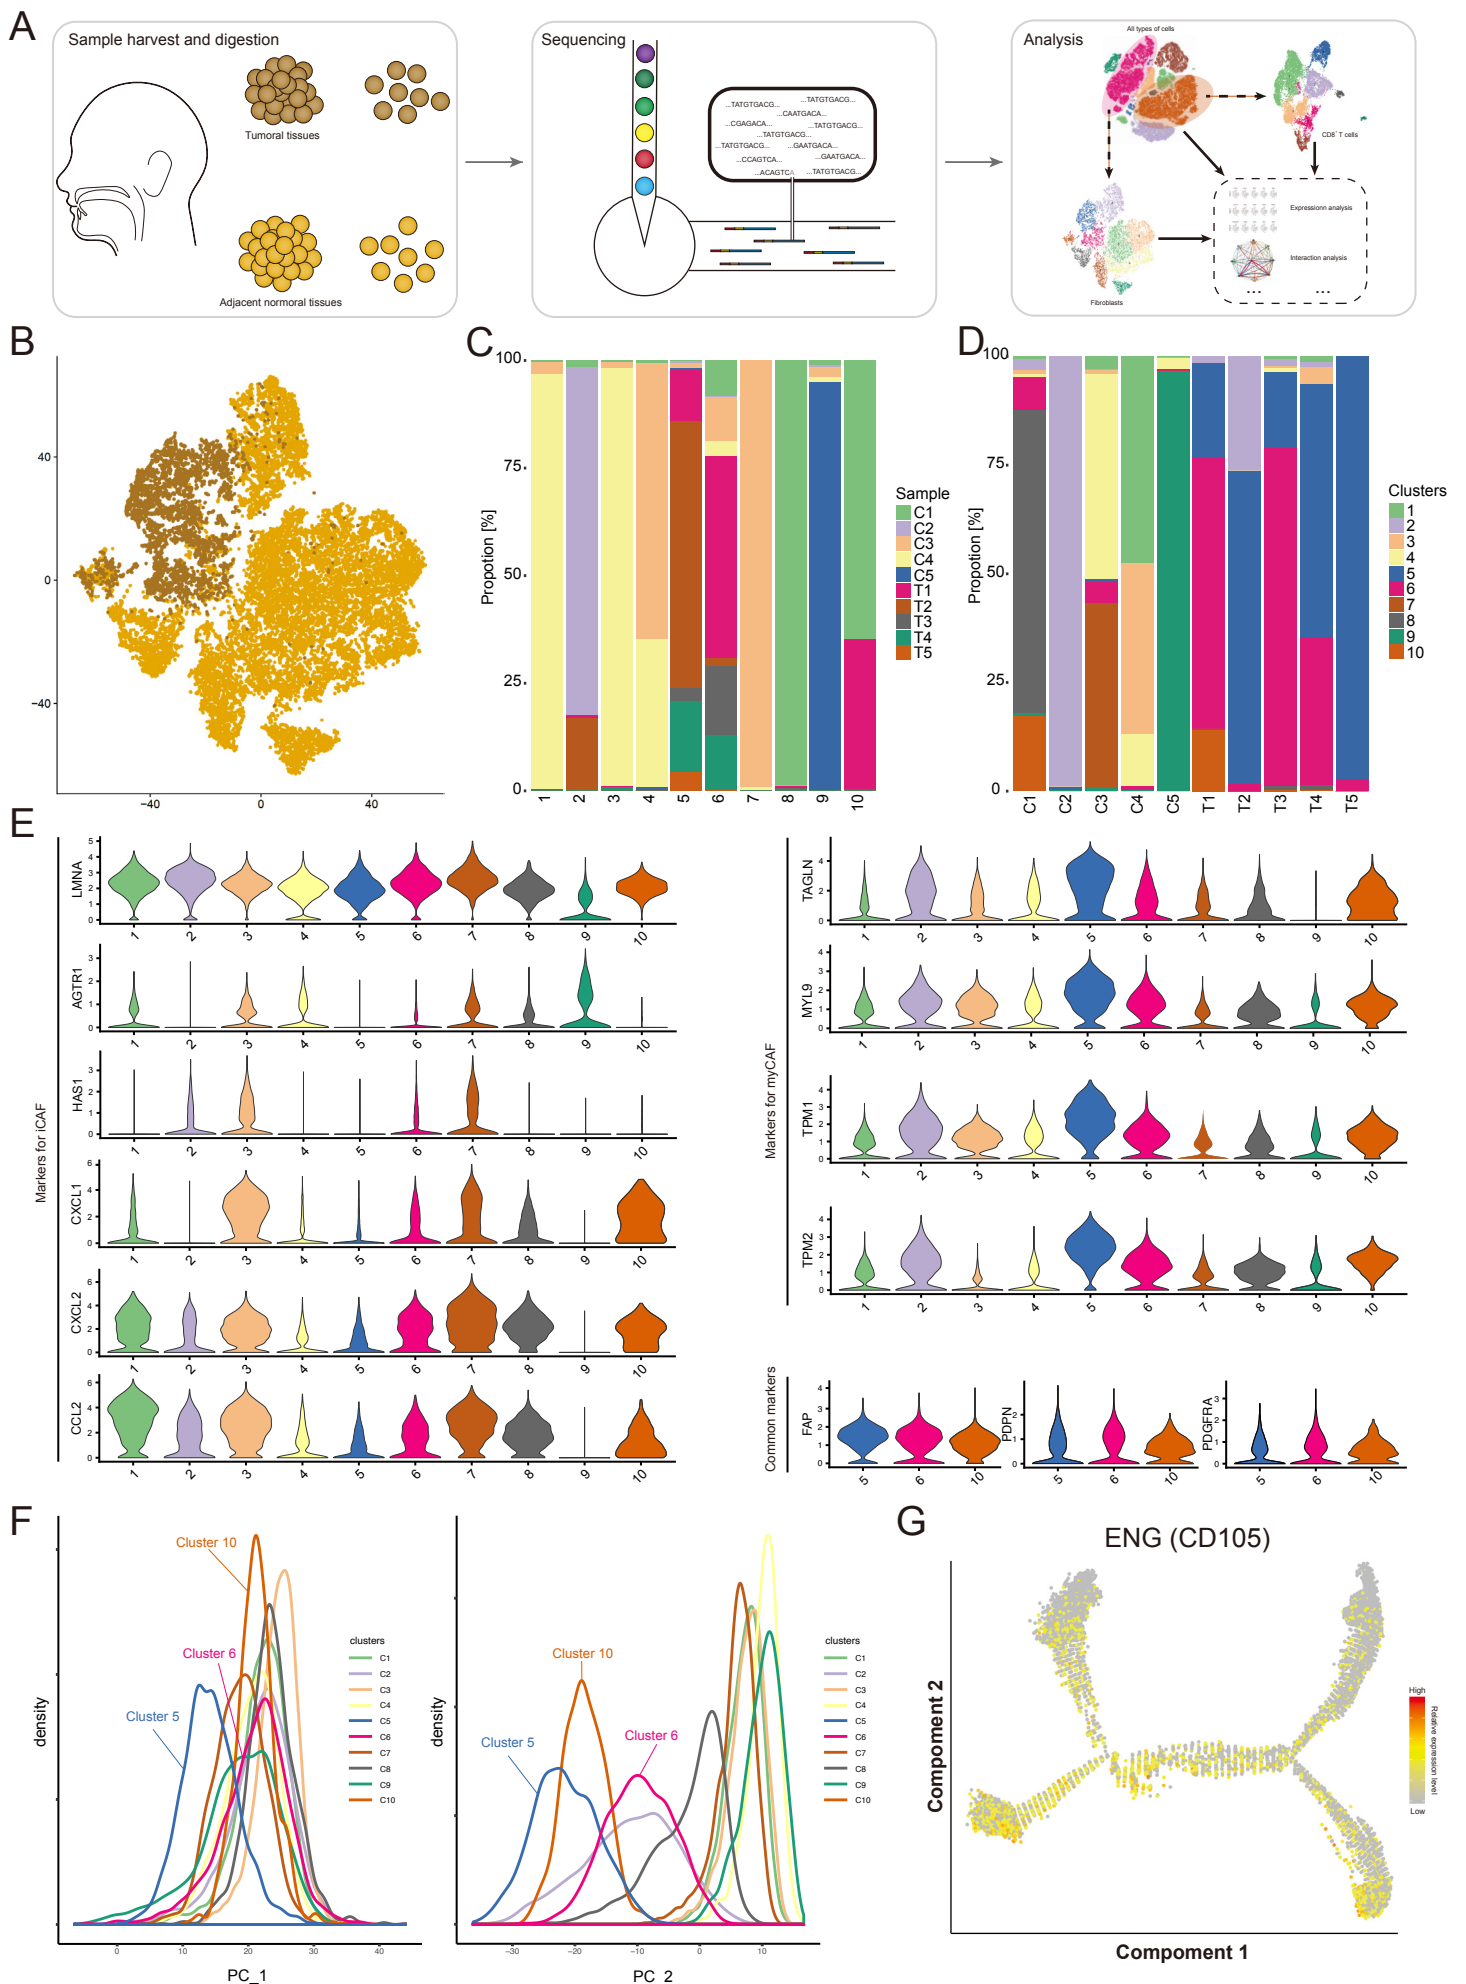



## Supplementary Figure S2.

Single-cell RNA sequencing results of fibroblasts from normal and tumoral tissues of HNSCC. **A**, A schematic illustration for single-cell RNA sequencing (scRNA-seq) and analysis of samples from patients with HNSCC. **B**, t-SNE plotting for scRNA-seq results of fibroblasts and labeled according to the tumoral (brown) or adjacent normal (yellow) tissues origins. **C** and **D**, The proportion histograms of fibroblast cluster composition ratios in different samples and different fibroblast clusters in each sample. **E**, The expression of iCAF-associated, myCAF-associated and universal genes in the scRNA-seq results. Comparing genes presented in Figure 2D and 2E, these genes had limited discrepancy among cluster 5, 6 and 10. **F**, Density distribution of cells from individual fibroblast clusters along the first principal or second component of the principal component analysis (PCA). **G**, Pseudotime analysis of fibroblasts overlaid with the expression of ENG (CD105).

# Supplementary Figure S3

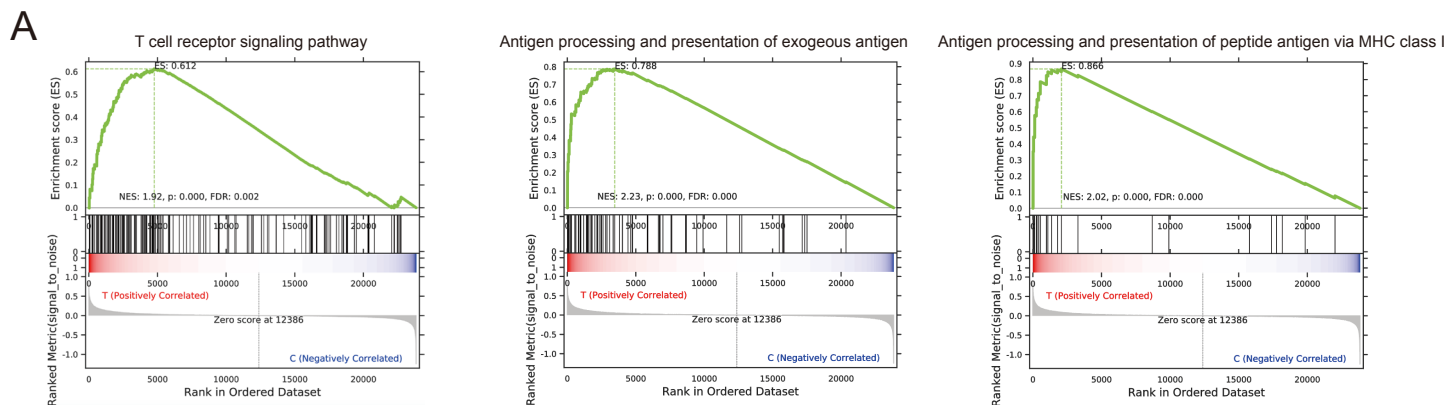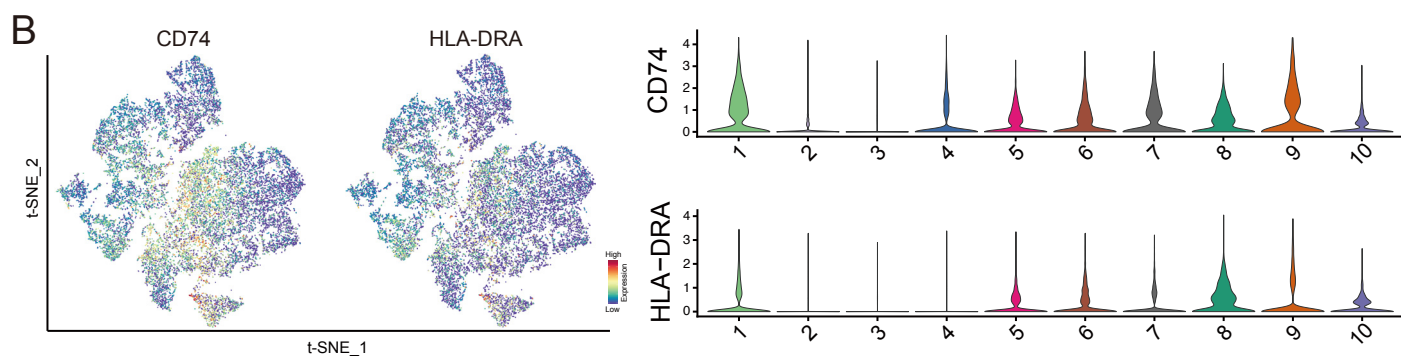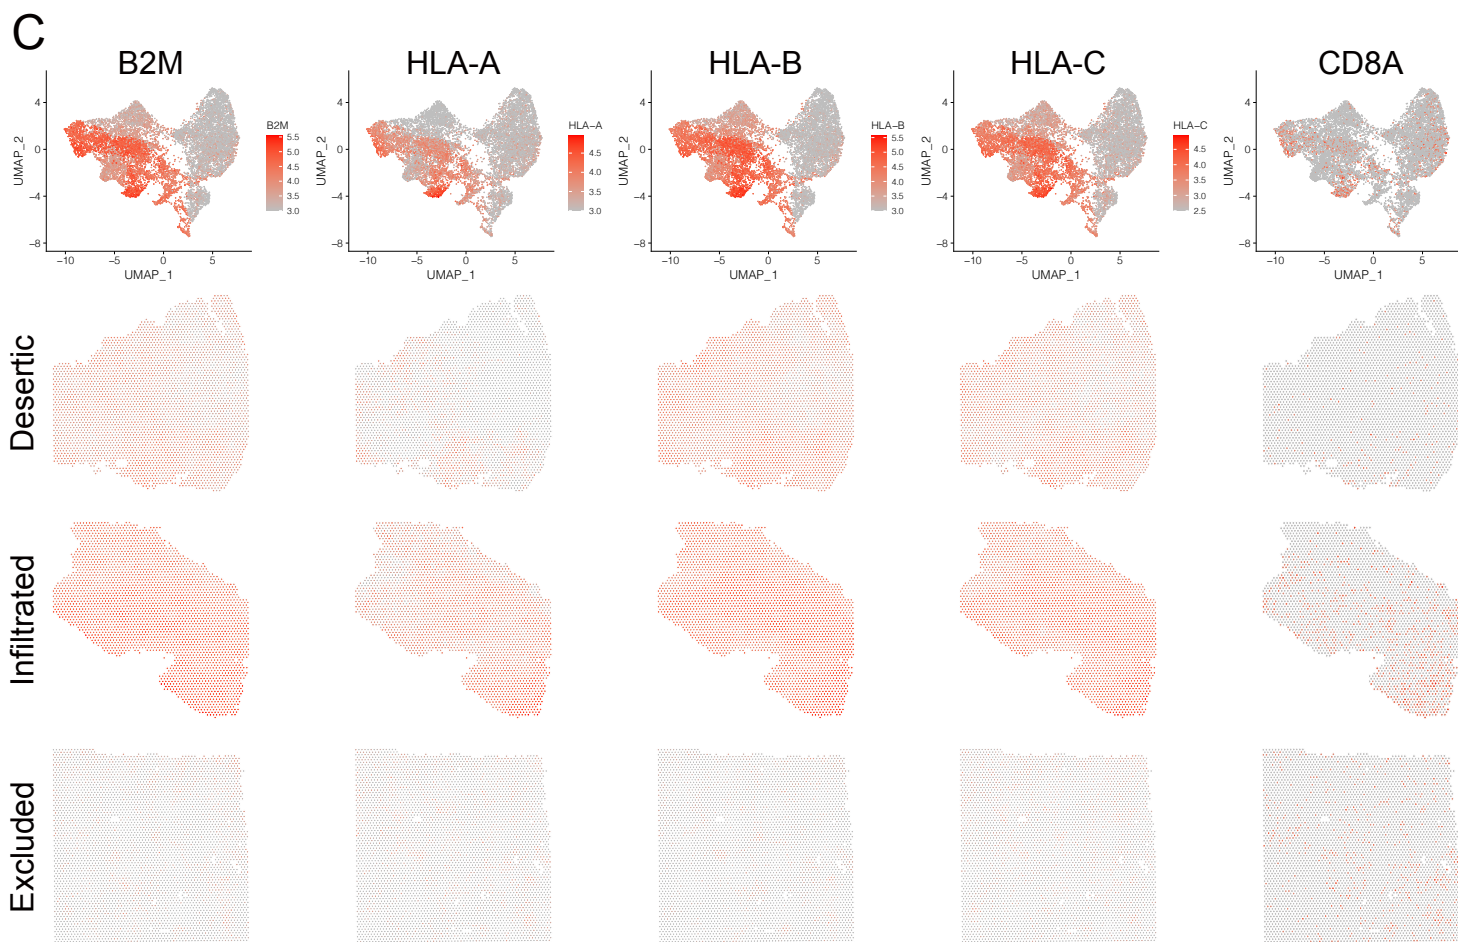

### **Supplementary Figure S3.**

High expression levels of CXCLs and MHC class I molecules linked cluster 5 and CD8+ T cells. **A**, GSEA analysis of DGEs between fibroblasts from tumoral and adjacent normal tissues. **B**, HLA-DRA and CD74 expressions in the 10 clusters of fibroblasts. **C**, Spatial expression and distribution of MHC class I molecules in the three immune types of HNSCC.



# Supplementary Figure S4

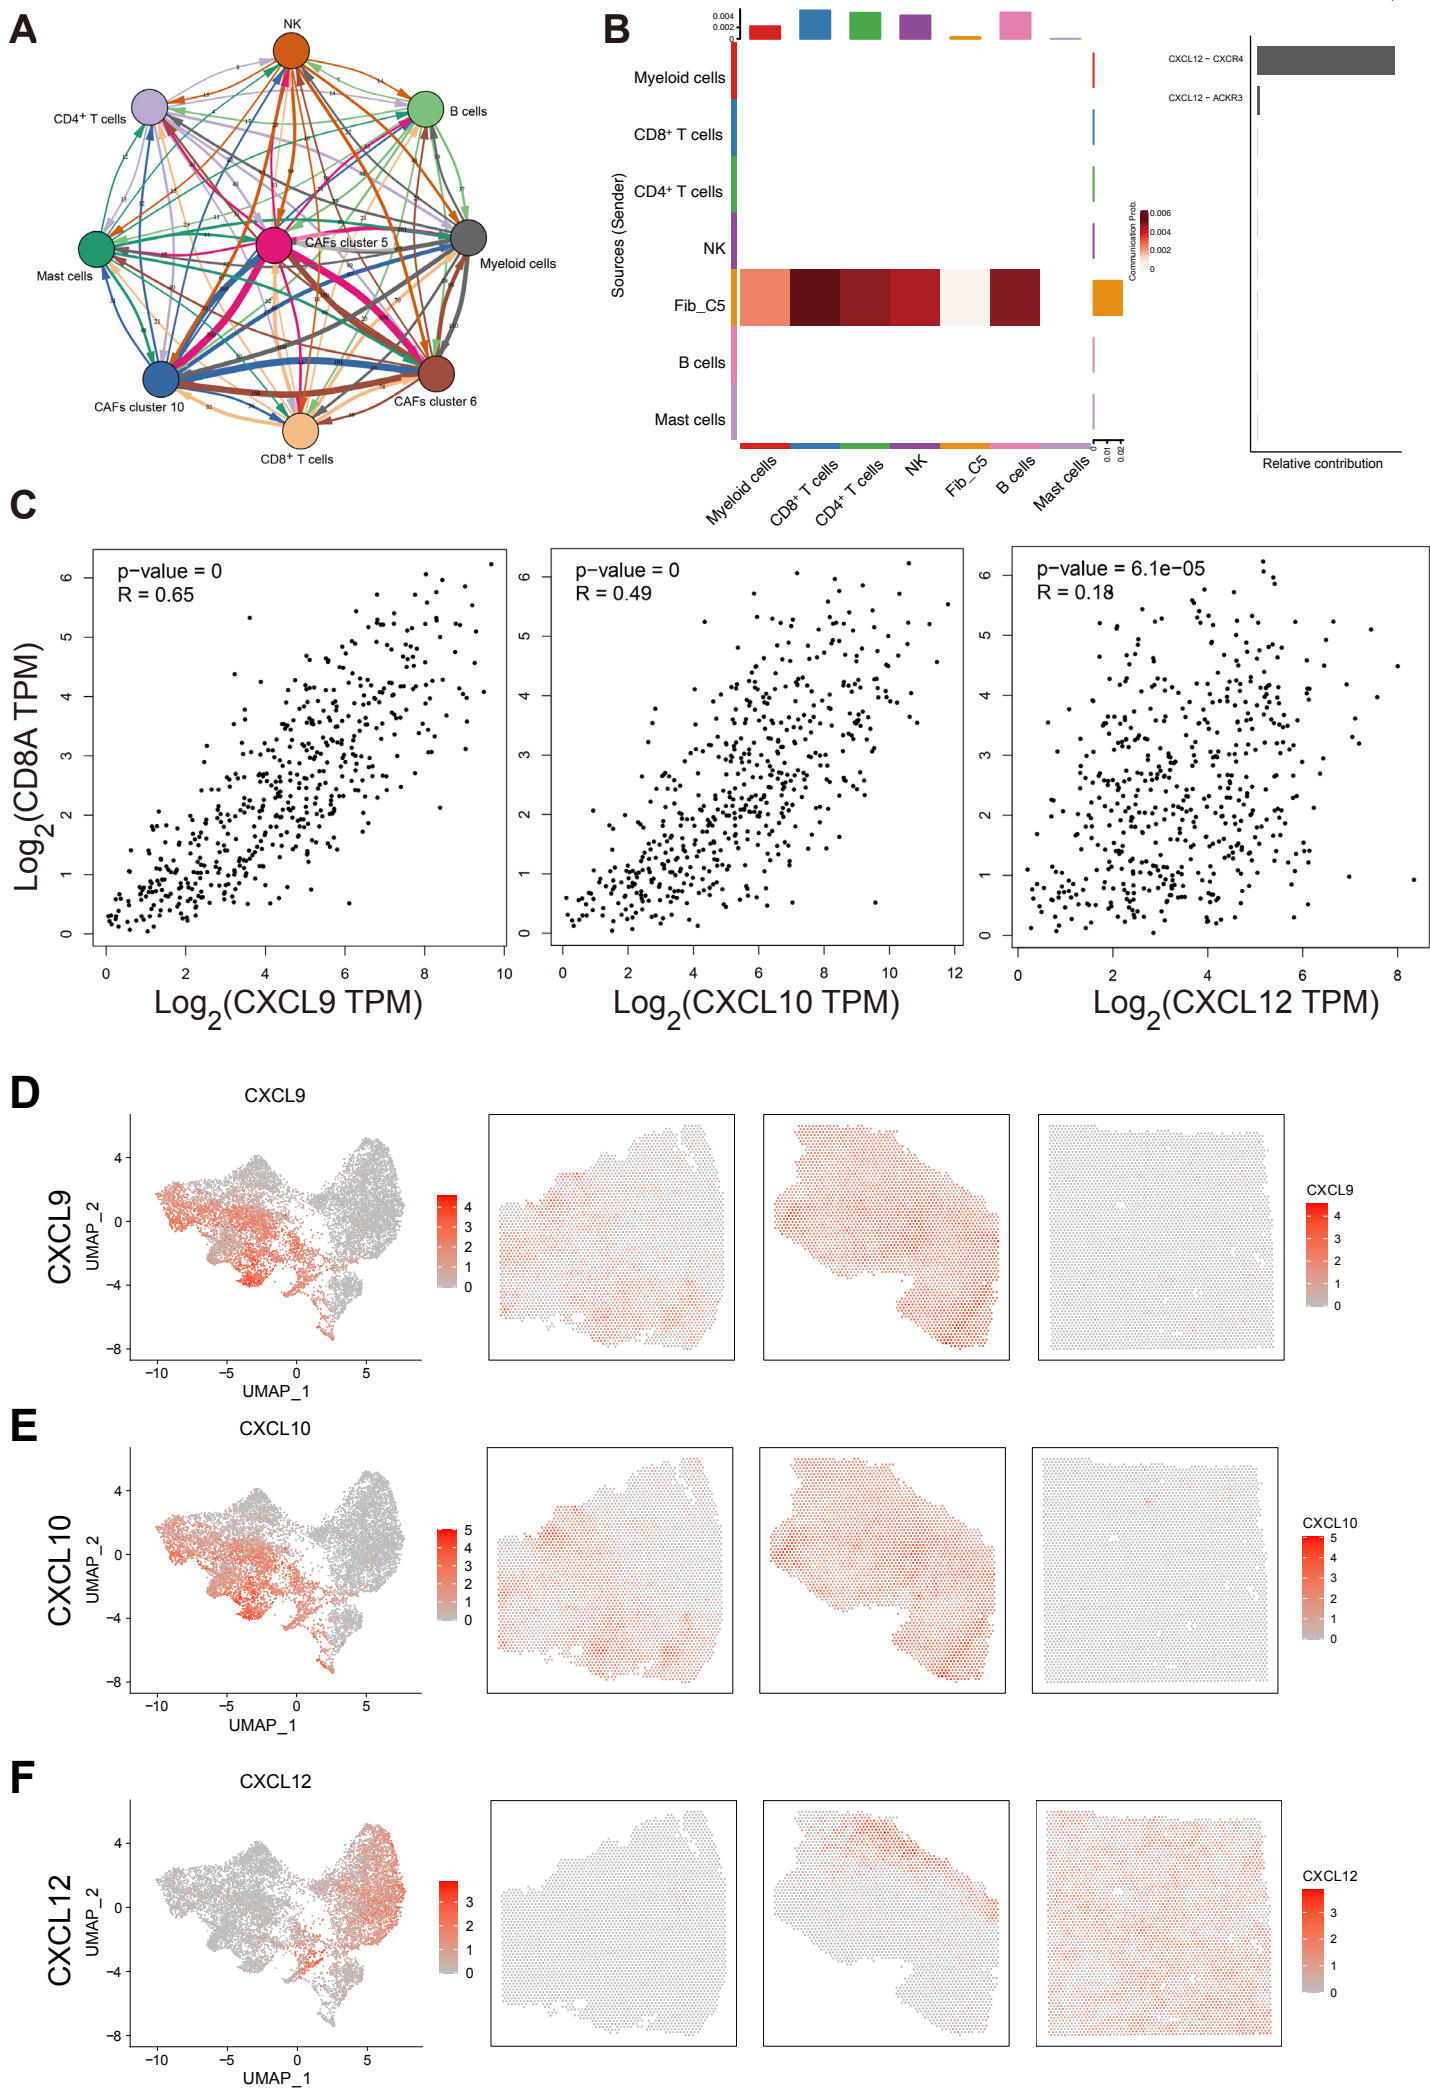

#### **Supplementary Figure S4.**

Spatial distribution of CXCLs and MHC class I molecules in different immune types of HNSCC. **A**, Cell Chat analysis between cluster 5 and cluster 6 fibroblasts and immune cells. **B**, CXCL signaling network among cluster 5 fibroblasts and immune cells. **C**, Correlation analysis of *CXCL9/10/12* and *CD8A* in HNSCC bulk-RNA sequencing results. **D-F**, Spatial expression and distribution of CXCLs, including (**D**) *CXCL9*, (**E**) *CXCL10* and (**F**) *CXCL12* in (left) deserty, (middle) infiltrated and (right) excluded immune types of HNSCC.

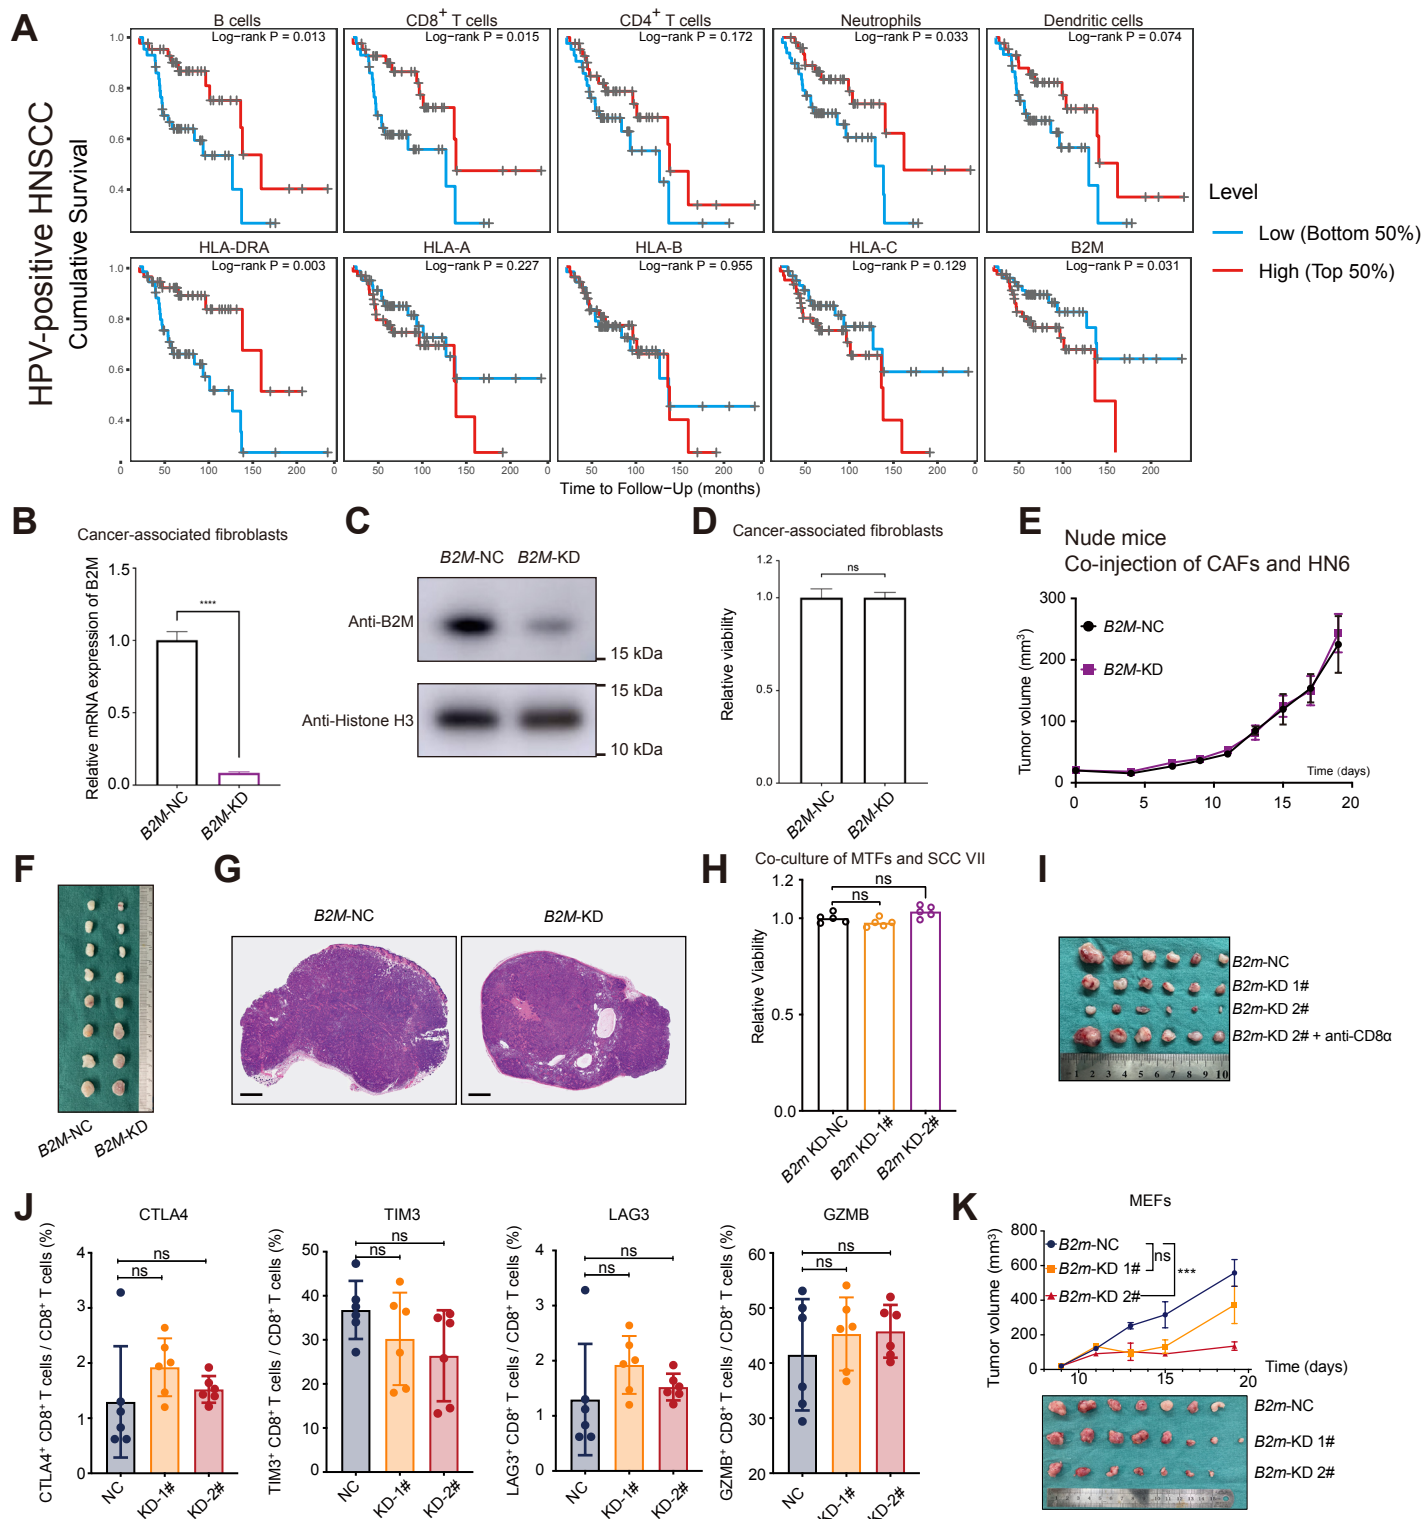



### Supplementary Figure S5.

Correlation between MHC class I molecules in the fibroblasts and tumor progression. **A**, Kaplan–Meier survival plot comparing cumulative survival of HPV-positive HNSCC patients with different level of signatures for immune cells and selected genes. **B-G**, Subcutaneous co-injection of *B2M*-KD CAFs and HN6 in nude mice. **B** and **C**, The expression of *B2M* was knocked down in CAFs and **(D)** the viability examined by CCK-8 did not change. **E-G**, The subcutaneous tumor growth curve and their H&E images. Scale bar, 800  $\mu$ m. **H**, The viability of SCC VII cells co-cultured with *B2m*-KD MTFs detected by CCK-8. **I**, The image for tumors isolated at day 19 after subcutaneous co-injection of SCCVII and MTFs in C3H/He mice. **J**, The proportion of CD8<sup>+</sup> T expressing cytotoxic cytokines (GZMB) and the immune checkpoints (CTLA4, TIM3, LAG3) in CD8<sup>+</sup> T cells isolated from subcutaneous tumors. **K**, The growth curve and the image for tumors derived from subcutaneous co-injection of SCCVII and MTFs.

# Supplementary Figure S6

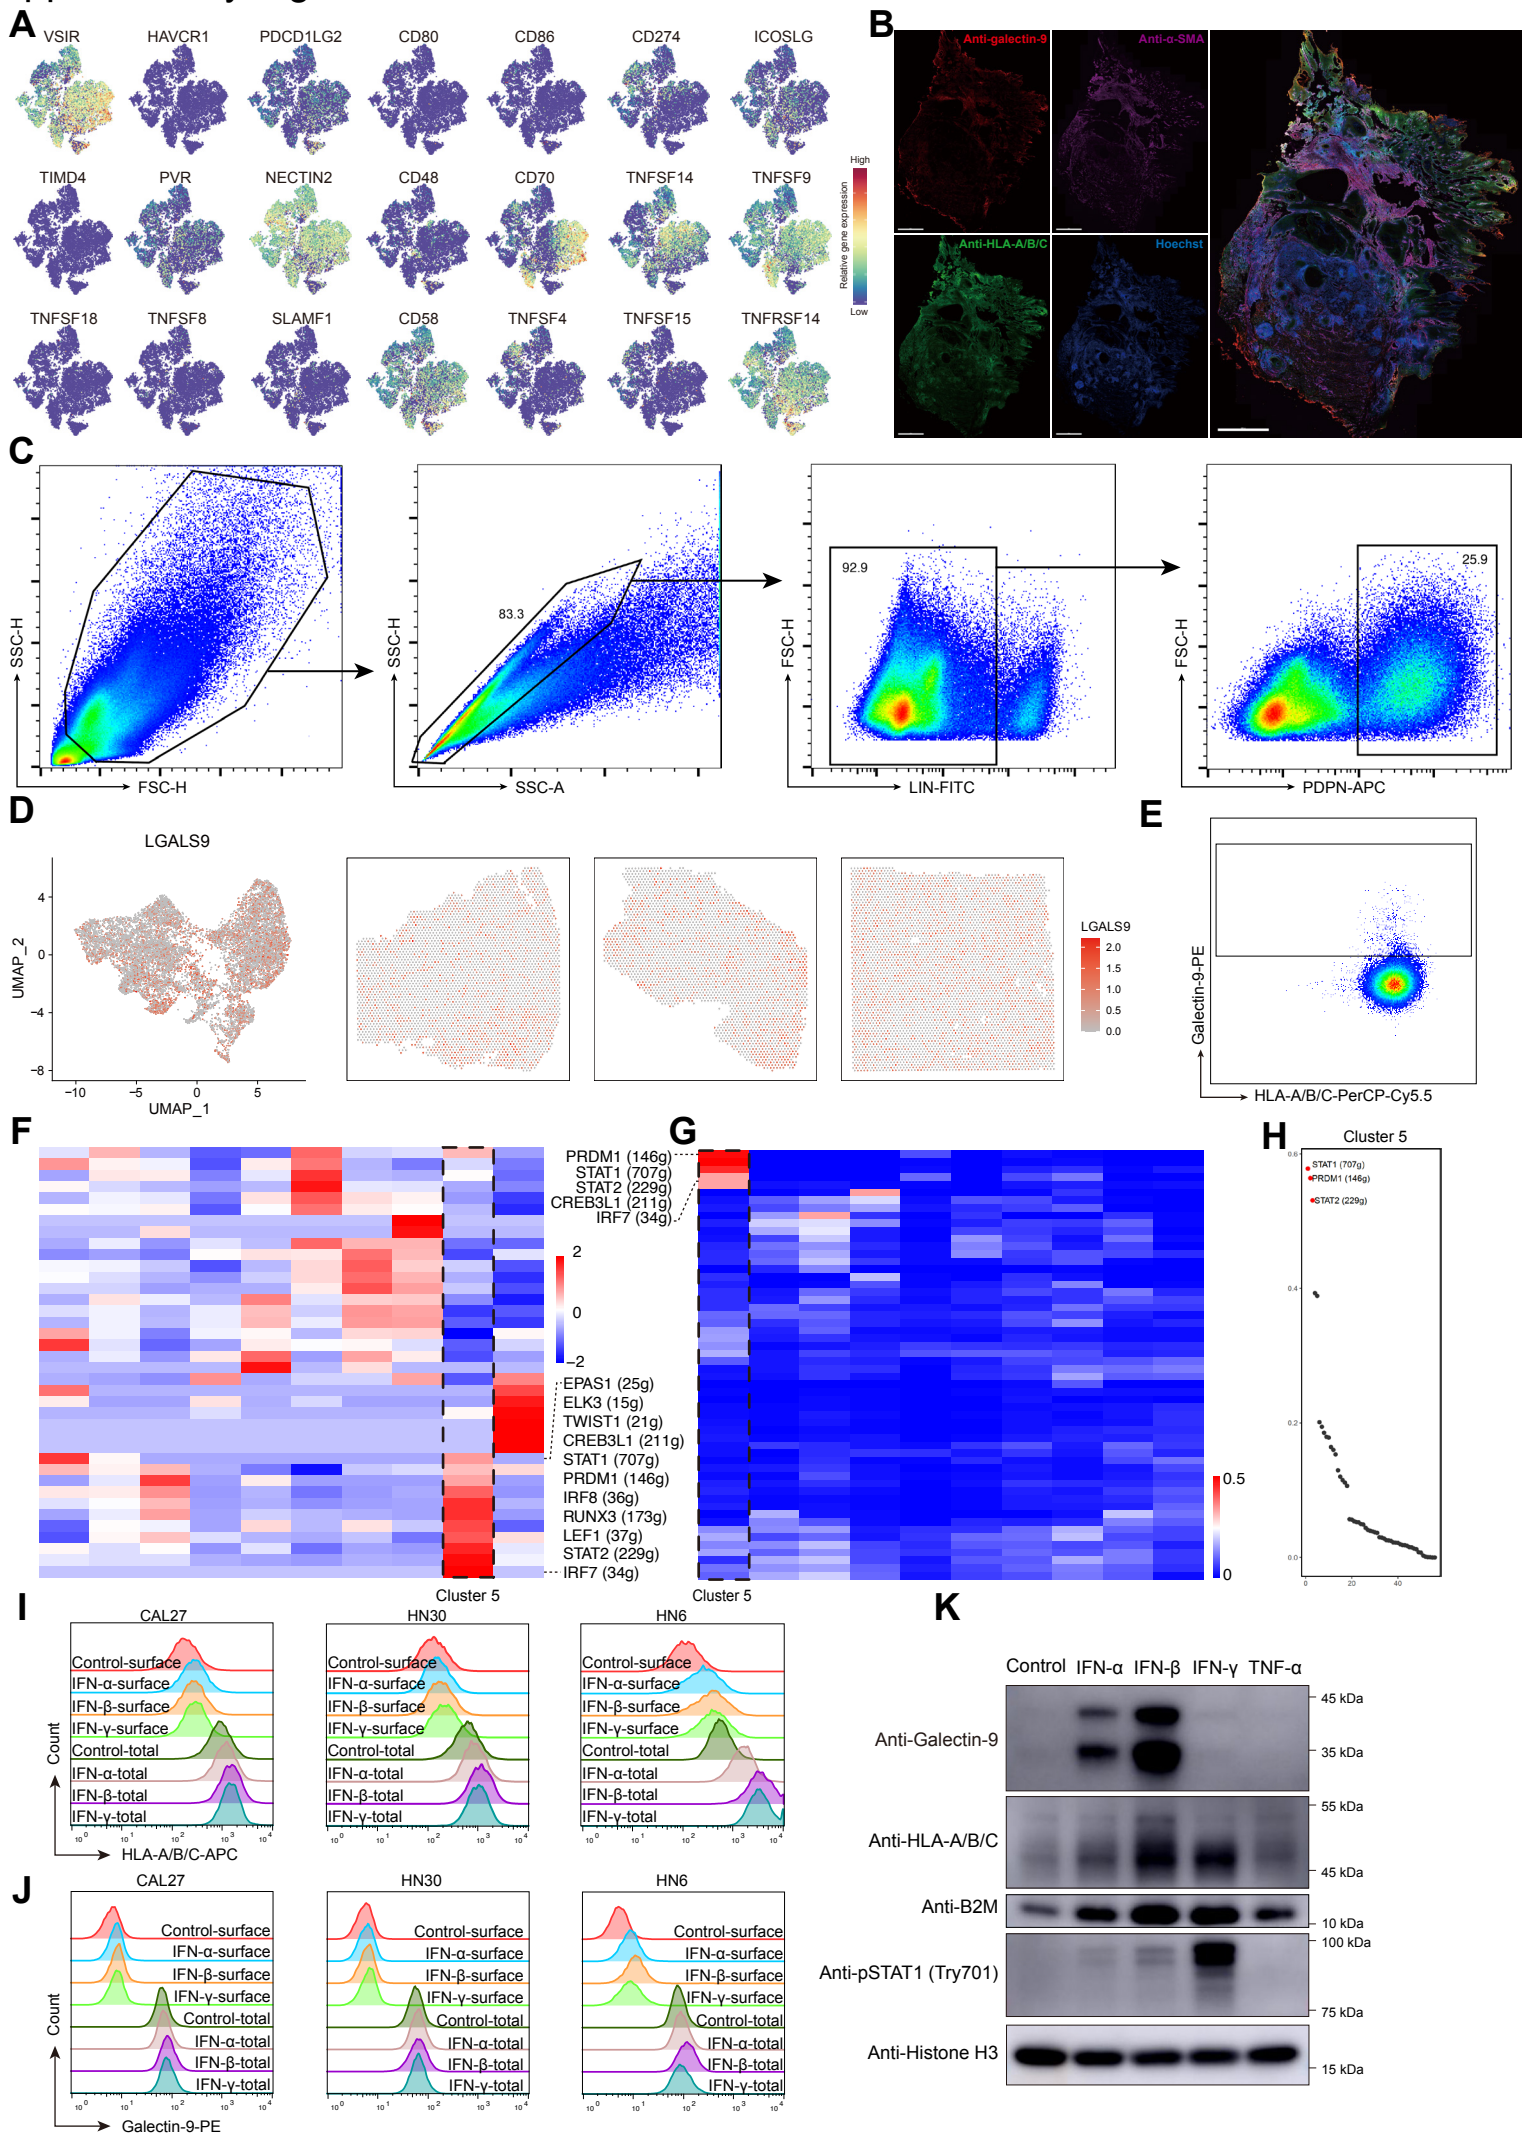

## Supplementary Figure S6.

The expression and spatial distribution of galectin-9 in HNSCC. **A**, The expression of immune-checkpoint-related genes in fibroblasts. **B**, Representative large-scaled immunofluorescence results of human HNSCC tumor samples stained for nuclei (cyan),  $\alpha$ -SMA (wine), galectin-9 (red), HLA-A/B/C (green). Scale bar, 2 mm. **C**, The flow cytometry gating strategy to isolate CAFs from HNSCC tumors for further analysis of galectin-9 and HLA-A/B/C. **D**, Spatial distribution of galectin-9 in different immune types of HNSCC. **E**, The expression of galectin-9 and HLA-A/B/C on CAFs cultured in vitro for two weeks. **F-H**, Scenic analysis for transcriptional regulons active in different clusters of CAFs indicated (**F**) activity levels of related regulons in each cluster and (**G**) specific regulons among these clusters. (**H**) The regulons in cluster 5 CAFs were ranked according to regulon specificity scores. **I** and **J**, The flow cytometry results for HLA-A/B/C and galectin-9 expression of HNSCC cell lines treated with IFNs. **K**, Western blotting results for HN6 cells treated with IFNs and TNF- $\alpha$ .



# Supplementary Figure S7

**A**

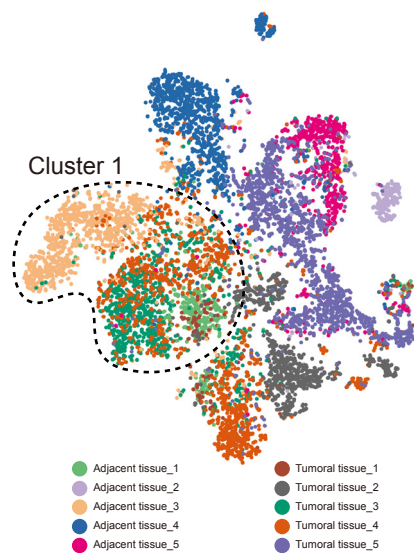

**B**

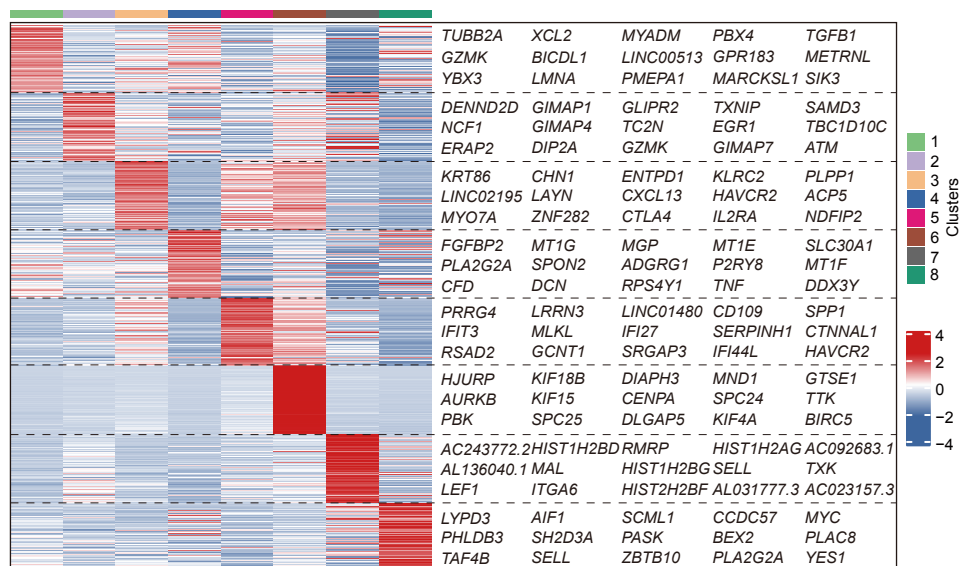

**C**

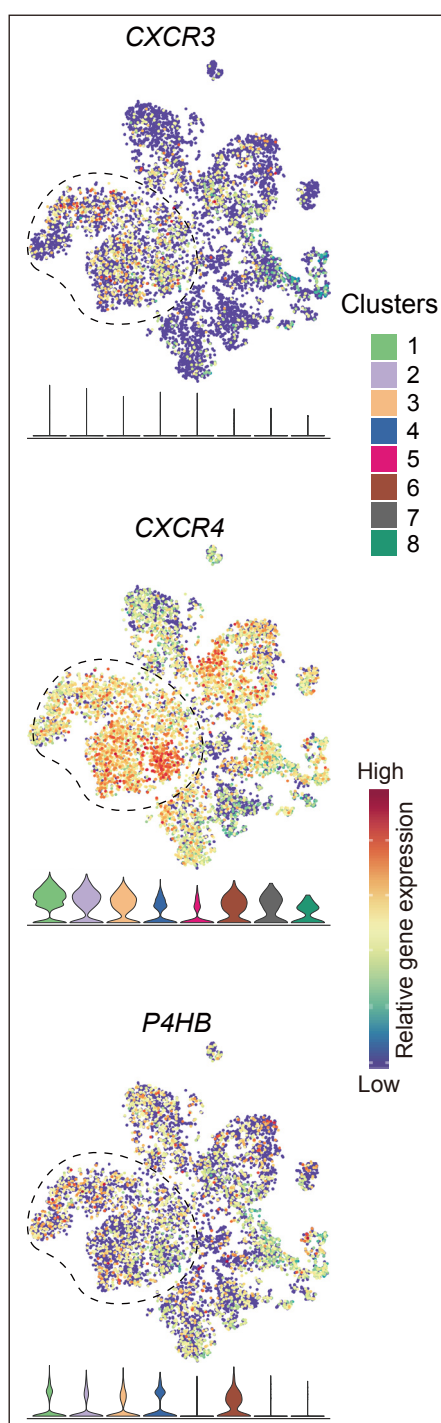

**D**

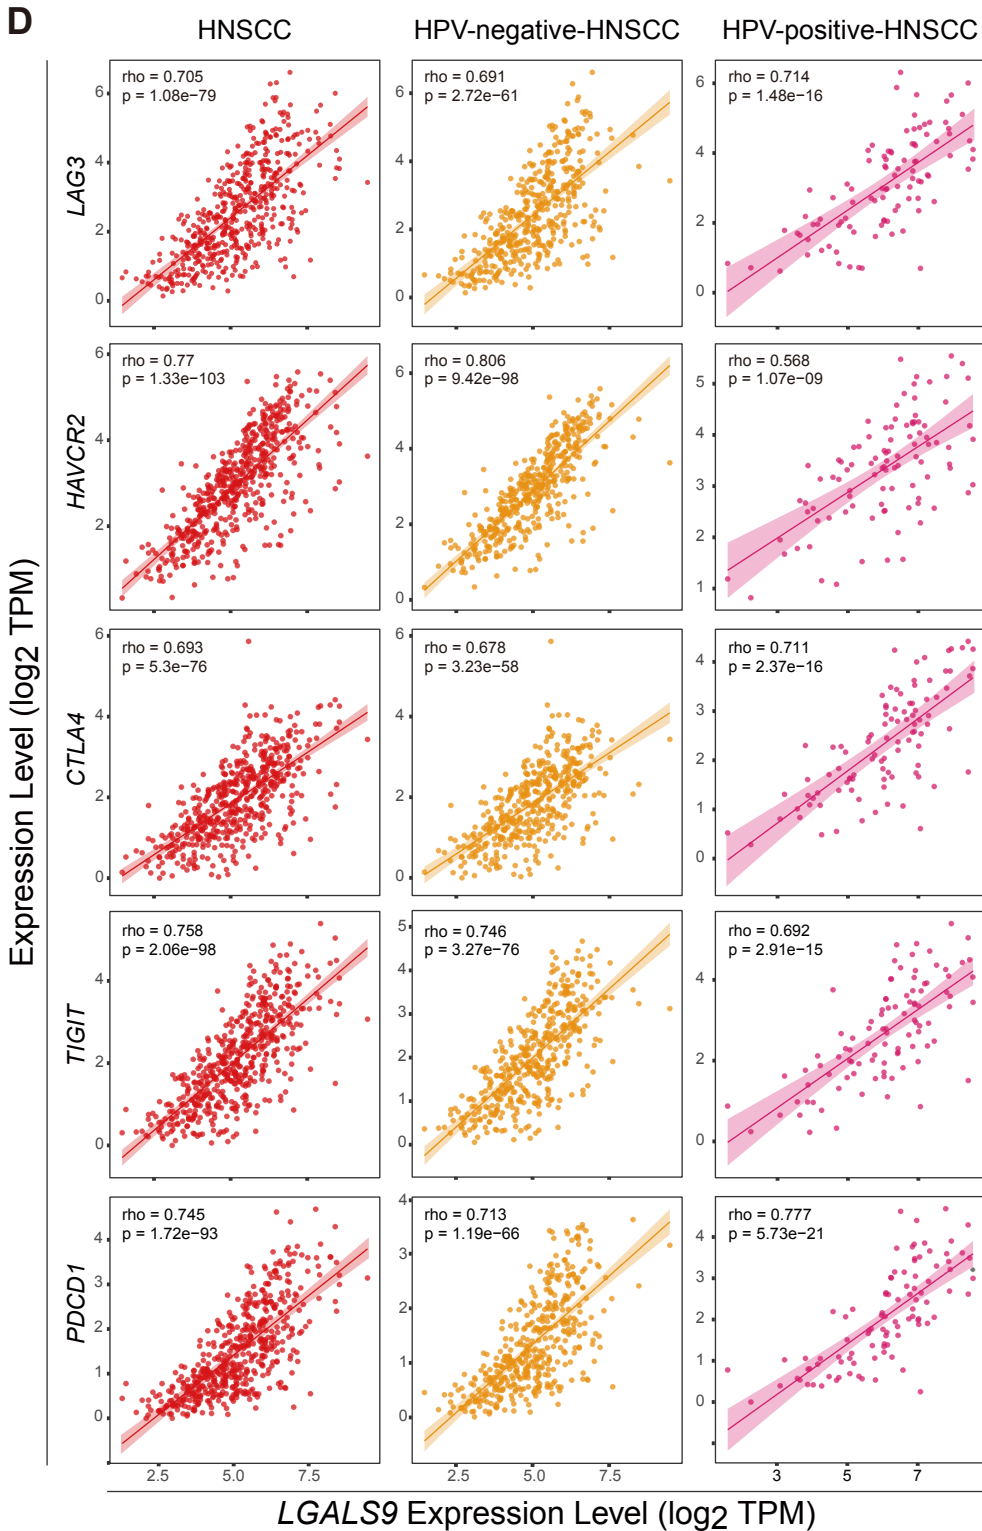

### Supplementary Figure S7.

Clustering of CD8<sup>+</sup> T cells from single-cell RNA-sequencing of tumoral and adjacent HNSCC tissues. **A**, t-SNE plots of CD8<sup>+</sup> T cells overlaid with sample origins. **B**, Expression heatmap of marker genes of the 8 clusters of CD8<sup>+</sup> T cells. **C**, t-SNE plots of CD8<sup>+</sup> T cells colored by expression of genes (*CXCR3*, *CXCR4*, *P4HB*). **D**, Correlation between immune checkpoint molecules (*CTLA4*, *HAVCR2*, *LAG3*, *TIGIT*, *PDCD1*) and *LGALS9* (galectin-9) in bulk-RNA sequencing data from HNSCC, HPV-negative and HPV-positive HNSCC patients in TCGA database.

# Supplementary Figure S8

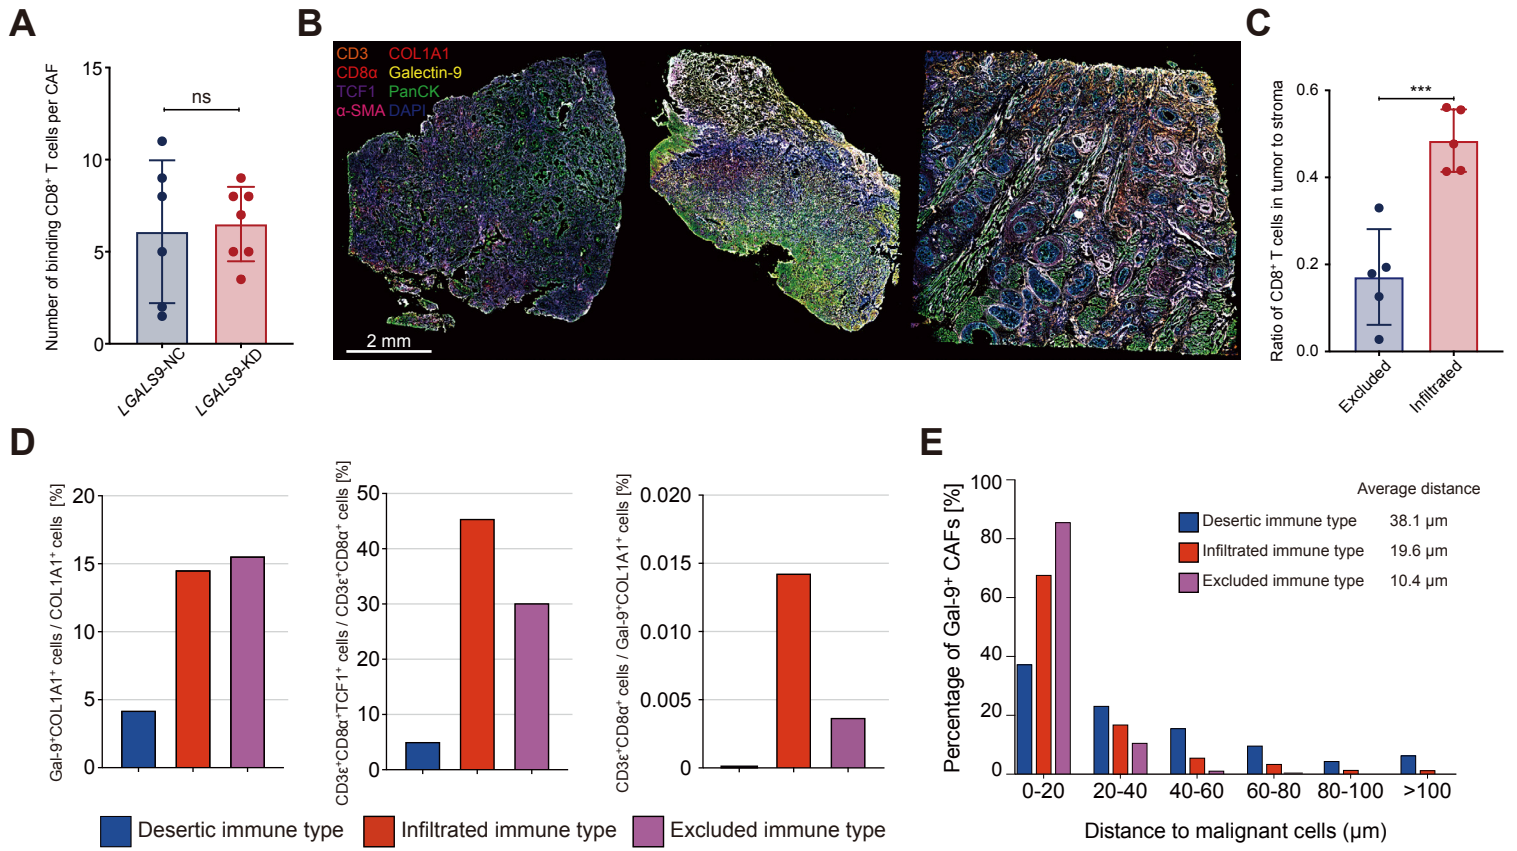



### Supplementary Figure S8.

Galectin-9 is associated with dysfunctional differentiation of TCF1<sup>+</sup>CD8<sup>+</sup> T cells. **A**, The number of CAF-binding CD8<sup>+</sup> T cells per CAF in the co-culture of these two types of cells after *LGALS9* KD in CAFs. **B**, Multiplex immunofluorescent staining (CD3, CD8 $\alpha$ , PanCK, COL1A1, Gal-9,  $\alpha$ -SMA) of three immune types HNSCC, the same specimens for spatial transcriptome sequencing. **C**, The ratio of the density of CD8<sup>+</sup> T cells in tumor nests to that in stroma. **D**, Proportion of (left) Gal-9<sup>+</sup> fibroblasts in fibroblasts and (middle) TCF1<sup>+</sup>CD8<sup>+</sup> T cells in CD8<sup>+</sup> T cells, and (right) the ratio of CD8<sup>+</sup> T cells compared with Gal-9<sup>+</sup> fibroblasts in the three immune types HNSCC. **E**, Proportion of Gal-9<sup>+</sup> CAFs (Gal9<sup>+</sup>COL1A1<sup>+</sup> cells) in different ranges of distances between these cells to malignant cells (PanCK<sup>+</sup> cells). Gal-9<sup>+</sup> CAFs that have a distance equal to zero to malignant cells have been removed since COL1A1 and PanCK are extracellular proteins.
